# Supplementary material
Source: MDPI journal article supplement (https://www.mdpi.com/search?q=ijms-20-06040)
Supplement: s001 [file ijms-20-06040-s001.pdf]

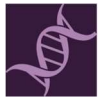

**Table S1.** List of miRNAs differentially expressed after *in vitro* lithium treatment exclusively in excellent responders at an FDR  $q < 0.2$ .

| miRNA           | FC   | <i>p</i> | FDR <i>q</i> |
|-----------------|------|----------|--------------|
| hsa-miR-29b-3p  | 1.41 | 0.0010   | 0.10         |
| hsa-miR-374a-5p | 1.54 | 0.0025   | 0.13         |
| hsa-miR-27a-3p  | 1.18 | 0.0040   | 0.14         |
| hsa-miR-23a-3p  | 1.25 | 0.0058   | 0.15         |
| hsa-miR-106b-5p | 1.28 | 0.0086   | 0.18         |

Abbreviations: FC, fold change; FDR, false discovery rate.

**Table S2.** Pairs of miRNAs and mRNAs differentially expressed between lithium excellent responders and non-responders, significantly negatively correlated and predicted by in-silico algorithms. The significant threshold was set at FDR  $q < 0.05$ .

| miRNA            | FC   | mRNA            | FC   | Pearson's <i>r</i> | <i>p</i>              | FDR <i>q</i> | <i>In-silico</i> score |
|------------------|------|-----------------|------|--------------------|-----------------------|--------------|------------------------|
| hsa-miR-421      | 1.34 | <i>PLCXD1</i>   | 0.74 | -0.87              | $3.58 \times 10^{-7}$ | 0.0148       | 1                      |
| hsa-miR-155-3p   | 2.27 | <i>RP2</i>      | 0.73 | -0.84              | $1.53 \times 10^{-6}$ | 0.0218       | 1                      |
| hsa-miR-320a     | 0.55 | <i>BHLHE40</i>  | 1.37 | -0.84              | $2.00 \times 10^{-6}$ | 0.0218       | 6                      |
| hsa-miR-1273h-3p | 0.49 | <i>PEX14</i>    | 1.08 | -0.84              | $2.14 \times 10^{-6}$ | 0.0218       | 1                      |
| hsa-miR-320a     | 0.55 | <i>LSP1</i>     | 1.48 | -0.83              | $2.36 \times 10^{-6}$ | 0.0218       | 1                      |
| hsa-miR-345-5p   | 0.56 | <i>STRA6</i>    | 1.21 | -0.83              | $3.17 \times 10^{-6}$ | 0.0235       | 1                      |
| hsa-miR-138-5p   | 0.32 | <i>GABARAP</i>  | 1.14 | -0.82              | $4.02 \times 10^{-6}$ | 0.0245       | 2                      |
| hsa-miR-138-5p   | 0.32 | <i>ZBTB45</i>   | 1.16 | -0.82              | $4.79 \times 10^{-6}$ | 0.0245       | 2                      |
| hsa-miR-320a     | 0.55 | <i>FSTL3</i>    | 1.64 | -0.82              | $5.51 \times 10^{-6}$ | 0.0245       | 1                      |
| hsa-miR-320a     | 0.55 | <i>C9</i>       | 1.13 | -0.81              | $6.10 \times 10^{-6}$ | 0.0245       | 2                      |
| hsa-miR-155-3p   | 2.27 | <i>DNASE1L3</i> | 0.29 | -0.81              | $6.19 \times 10^{-6}$ | 0.0245       | 1                      |
| hsa-miR-9-5p     | 0.57 | <i>PARP4</i>    | 1.13 | -0.81              | $6.62 \times 10^{-6}$ | 0.0245       | 1                      |
| hsa-miR-15a-5p   | 1.62 | <i>SMARCA2</i>  | 0.74 | -0.80              | $1.01 \times 10^{-5}$ | 0.0304       | 1                      |
| hsa-miR-155-3p   | 2.27 | <i>SP4</i>      | 0.68 | -0.80              | $1.09 \times 10^{-5}$ | 0.0304       | 4                      |
| hsa-miR-378a-3p  | 0.68 | <i>ATF7</i>     | 1.14 | -0.80              | $1.15 \times 10^{-5}$ | 0.0304       | 2                      |
| hsa-miR-155-3p   | 2.27 | <i>ZC3HC1</i>   | 0.88 | -0.80              | $1.19 \times 10^{-5}$ | 0.0304       | 1                      |
| hsa-miR-421      | 1.34 | <i>SFRP1</i>    | 0.51 | -0.80              | $1.38 \times 10^{-5}$ | 0.0304       | 2                      |
| hsa-miR-374a-3p  | 1.74 | <i>ENGASE</i>   | 0.84 | -0.80              | $1.39 \times 10^{-5}$ | 0.0304       | 1                      |
| hsa-miR-574-3p   | 0.32 | <i>TCEB3</i>    | 1.25 | -0.80              | $1.39 \times 10^{-5}$ | 0.0304       | 2                      |
| hsa-miR-374a-3p  | 1.74 | <i>PTPMT1</i>   | 0.91 | -0.79              | $1.42 \times 10^{-5}$ | 0.0304       | 1                      |
| hsa-miR-1273h-3p | 0.49 | <i>ISCU</i>     | 1.19 | -0.79              | $1.48 \times 10^{-5}$ | 0.0304       | 3                      |
| hsa-miR-345-5p   | 0.56 | <i>RER1</i>     | 1.11 | -0.79              | $1.57 \times 10^{-5}$ | 0.0304       | 2                      |
| hsa-miR-1273h-3p | 0.49 | <i>EDF1</i>     | 1.13 | -0.79              | $1.58 \times 10^{-5}$ | 0.0304       | 2                      |
| hsa-miR-378a-3p  | 0.68 | <i>DCAF11</i>   | 1.17 | -0.79              | $1.64 \times 10^{-5}$ | 0.0304       | 1                      |
| hsa-miR-320a     | 0.55 | <i>PAPSS2</i>   | 2.59 | -0.79              | $1.75 \times 10^{-5}$ | 0.0314       | 1                      |
| hsa-miR-138-5p   | 0.32 | <i>BCL2L1</i>   | 1.39 | -0.79              | $1.78 \times 10^{-5}$ | 0.0314       | 4                      |
| hsa-miR-374a-3p  | 1.74 | <i>PLXNA1</i>   | 0.76 | -0.79              | $1.90 \times 10^{-5}$ | 0.0321       | 1                      |

|                  |      |                 |      |       |                       |        |   |
|------------------|------|-----------------|------|-------|-----------------------|--------|---|
| hsa-miR-320a     | 0.55 | <i>RHOA</i>     | 1.11 | -0.79 | $1.99 \times 10^{-5}$ | 0.0321 | 1 |
| hsa-miR-27a-5p   | 1.66 | <i>DNAJB4</i>   | 0.73 | -0.78 | $2.07 \times 10^{-5}$ | 0.0321 | 1 |
| hsa-miR-345-5p   | 0.56 | <i>CYB5D2</i>   | 1.24 | -0.78 | $2.31 \times 10^{-5}$ | 0.0332 | 3 |
| hsa-miR-378a-3p  | 0.68 | <i>SIRT2</i>    | 1.14 | -0.78 | $2.38 \times 10^{-5}$ | 0.0332 | 1 |
| hsa-miR-378a-3p  | 0.68 | <i>PPP1CA</i>   | 1.15 | -0.78 | $2.69 \times 10^{-5}$ | 0.0338 | 2 |
| hsa-miR-378a-3p  | 0.68 | <i>ASCC1</i>    | 1.24 | -0.78 | $2.86 \times 10^{-5}$ | 0.0349 | 1 |
| hsa-miR-320a     | 0.55 | <i>FAM3D</i>    | 1.09 | -0.78 | $2.89 \times 10^{-5}$ | 0.0349 | 1 |
| hsa-miR-574-3p   | 0.32 | <i>RNF31</i>    | 1.17 | -0.78 | $2.94 \times 10^{-5}$ | 0.0349 | 1 |
| hsa-miR-574-3p   | 0.32 | <i>CREM</i>     | 1.34 | -0.78 | $2.97 \times 10^{-5}$ | 0.0349 | 1 |
| hsa-miR-454-5p   | 2.14 | <i>SIRT4</i>    | 0.88 | -0.77 | $3.38 \times 10^{-5}$ | 0.0374 | 1 |
| hsa-miR-155-3p   | 2.27 | <i>BICD2</i>    | 0.89 | -0.77 | $3.40 \times 10^{-5}$ | 0.0374 | 4 |
| hsa-miR-125a-5p  | 0.16 | <i>STS</i>      | 1.86 | -0.77 | $3.52 \times 10^{-5}$ | 0.0374 | 4 |
| hsa-miR-421      | 1.34 | <i>ANGPTL2</i>  | 0.77 | -0.77 | $3.59 \times 10^{-5}$ | 0.0374 | 4 |
| hsa-miR-15a-5p   | 1.62 | <i>DIABLO</i>   | 0.90 | -0.77 | $3.69 \times 10^{-5}$ | 0.0374 | 1 |
| hsa-miR-1273h-3p | 0.49 | <i>BOD1</i>     | 1.11 | -0.77 | $3.73 \times 10^{-5}$ | 0.0374 | 1 |
| hsa-miR-345-5p   | 0.56 | <i>TSPYL1</i>   | 1.21 | -0.77 | $3.75 \times 10^{-5}$ | 0.0374 | 1 |
| hsa-miR-142-3p   | 1.47 | <i>BDH1</i>     | 0.88 | -0.77 | $3.85 \times 10^{-5}$ | 0.0374 | 2 |
| hsa-miR-378a-3p  | 0.68 | <i>DUSP4</i>    | 1.50 | -0.77 | $3.91 \times 10^{-5}$ | 0.0374 | 5 |
| hsa-miR-320a     | 0.55 | <i>CA5B</i>     | 1.42 | -0.77 | $3.98 \times 10^{-5}$ | 0.0374 | 3 |
| hsa-miR-1273h-3p | 0.49 | <i>FPGS</i>     | 1.10 | -0.77 | $4.04 \times 10^{-5}$ | 0.0374 | 2 |
| hsa-miR-130b-3p  | 0.69 | <i>GFOD2</i>    | 1.12 | -0.77 | $4.24 \times 10^{-5}$ | 0.0374 | 1 |
| hsa-miR-15a-5p   | 1.62 | <i>WDR48</i>    | 0.82 | -0.76 | $4.30 \times 10^{-5}$ | 0.0374 | 3 |
| hsa-miR-1273h-3p | 0.49 | <i>MAPK8IP3</i> | 1.10 | -0.76 | $4.31 \times 10^{-5}$ | 0.0374 | 2 |
| hsa-miR-941      | 0.54 | <i>MFNG</i>     | 1.28 | -0.76 | $4.35 \times 10^{-5}$ | 0.0374 | 2 |
| hsa-miR-194-5p   | 0.6  | <i>ST8SIA2</i>  | 1.14 | -0.76 | $4.36 \times 10^{-5}$ | 0.0374 | 1 |
| hsa-miR-9-5p     | 0.57 | <i>IL2RA</i>    | 2.46 | -0.76 | $4.38 \times 10^{-5}$ | 0.0374 | 2 |
| hsa-miR-320a     | 0.55 | <i>ADD1</i>     | 1.15 | -0.76 | $4.49 \times 10^{-5}$ | 0.0374 | 4 |
| hsa-miR-378a-3p  | 0.68 | <i>ZNF70</i>    | 1.22 | -0.76 | $4.52 \times 10^{-5}$ | 0.0374 | 3 |
| hsa-miR-155-3p   | 2.27 | <i>KYAT1</i>    | 0.75 | -0.76 | $4.53 \times 10^{-5}$ | 0.0374 | 1 |
| hsa-miR-374a-3p  | 1.74 | <i>PIR</i>      | 0.73 | -0.76 | $4.56 \times 10^{-5}$ | 0.0374 | 2 |
| hsa-miR-378a-3p  | 0.68 | <i>SH2B3</i>    | 1.31 | -0.76 | $4.79 \times 10^{-5}$ | 0.0374 | 2 |
| hsa-miR-505-3p   | 0.5  | <i>VAPB</i>     | 1.14 | -0.76 | $4.80 \times 10^{-5}$ | 0.0374 | 4 |
| hsa-miR-320a     | 0.55 | <i>EDEM1</i>    | 1.25 | -0.76 | $4.83 \times 10^{-5}$ | 0.0374 | 5 |
| hsa-miR-378a-3p  | 0.68 | <i>ZBTB45</i>   | 1.16 | -0.76 | $4.89 \times 10^{-5}$ | 0.0374 | 1 |
| hsa-miR-148a-3p  | 2.23 | <i>EIF2AK2</i>  | 0.84 | -0.76 | $5.12 \times 10^{-5}$ | 0.0377 | 2 |
| hsa-miR-574-3p   | 0.32 | <i>PSMC1</i>    | 1.17 | -0.76 | $5.22 \times 10^{-5}$ | 0.0377 | 1 |
| hsa-miR-320a     | 0.55 | <i>BCL2L1</i>   | 1.39 | -0.76 | $5.25 \times 10^{-5}$ | 0.0377 | 1 |
| hsa-miR-345-5p   | 0.56 | <i>GRHL3</i>    | 1.18 | -0.76 | $5.27 \times 10^{-5}$ | 0.0377 | 1 |
| hsa-miR-374a-3p  | 1.74 | <i>TNS3</i>     | 0.73 | -0.76 | $5.34 \times 10^{-5}$ | 0.0377 | 1 |
| hsa-miR-378a-3p  | 0.68 | <i>ARPC4</i>    | 1.18 | -0.76 | $5.46 \times 10^{-5}$ | 0.0382 | 2 |
| hsa-miR-15a-5p   | 1.62 | <i>CHMP7</i>    | 0.81 | -0.76 | $5.56 \times 10^{-5}$ | 0.0385 | 1 |
| hsa-miR-15a-5p   | 1.62 | <i>VPRBP</i>    | 0.85 | -0.76 | $5.64 \times 10^{-5}$ | 0.0385 | 1 |
| hsa-miR-378a-3p  | 0.68 | <i>TMEM8A</i>   | 1.23 | -0.76 | $5.66 \times 10^{-5}$ | 0.0385 | 1 |

|                  |      |                 |      |       |                       |        |   |
|------------------|------|-----------------|------|-------|-----------------------|--------|---|
| hsa-miR-181a-3p  | 2.61 | <i>CD59</i>     | 0.84 | -0.75 | $6.05 \times 10^{-5}$ | 0.0395 | 1 |
| hsa-miR-378a-3p  | 0.68 | <i>SCAMP2</i>   | 1.34 | -0.75 | $6.12 \times 10^{-5}$ | 0.0395 | 1 |
| hsa-miR-1273h-3p | 0.49 | <i>UPP1</i>     | 1.45 | -0.75 | $6.16 \times 10^{-5}$ | 0.0395 | 1 |
| hsa-miR-345-5p   | 0.56 | <i>PLEKHG5</i>  | 1.08 | -0.75 | $6.23 \times 10^{-5}$ | 0.0395 | 1 |
| hsa-miR-1273h-3p | 0.49 | <i>CCM2</i>     | 1.17 | -0.75 | $6.24 \times 10^{-5}$ | 0.0395 | 1 |
| hsa-miR-378a-3p  | 0.68 | <i>RPS6KA1</i>  | 1.19 | -0.75 | $6.27 \times 10^{-5}$ | 0.0395 | 4 |
| hsa-miR-1273h-3p | 0.49 | <i>TRAF4</i>    | 1.26 | -0.75 | $6.27 \times 10^{-5}$ | 0.0395 | 2 |
| hsa-miR-155-3p   | 2.27 | <i>KPTN</i>     | 0.73 | -0.75 | $6.31 \times 10^{-5}$ | 0.0395 | 1 |
| hsa-miR-1273h-3p | 0.49 | <i>PDZD2</i>    | 1.36 | -0.75 | $6.47 \times 10^{-5}$ | 0.0395 | 1 |
| hsa-miR-155-3p   | 2.27 | <i>NDRG3</i>    | 0.73 | -0.75 | $6.67 \times 10^{-5}$ | 0.0395 | 6 |
| hsa-miR-378a-3p  | 0.68 | <i>DAP</i>      | 1.17 | -0.75 | $6.74 \times 10^{-5}$ | 0.0395 | 2 |
| hsa-miR-155-3p   | 2.27 | <i>PHF16</i>    | 0.42 | -0.75 | $6.77 \times 10^{-5}$ | 0.0395 | 4 |
| hsa-miR-320a     | 0.55 | <i>STAT5A</i>   | 1.25 | -0.75 | $6.80 \times 10^{-5}$ | 0.0395 | 2 |
| hsa-miR-505-3p   | 0.5  | <i>CIRBP</i>    | 1.37 | -0.75 | $6.87 \times 10^{-5}$ | 0.0395 | 1 |
| hsa-miR-9-5p     | 0.57 | <i>CD40LG</i>   | 1.14 | -0.75 | $6.98 \times 10^{-5}$ | 0.0395 | 2 |
| hsa-miR-574-3p   | 0.32 | <i>ISG20L2</i>  | 1.34 | -0.75 | $7.05 \times 10^{-5}$ | 0.0395 | 1 |
| hsa-miR-378a-3p  | 0.68 | <i>PIGT</i>     | 1.13 | -0.75 | $7.05 \times 10^{-5}$ | 0.0395 | 3 |
| hsa-miR-505-3p   | 0.5  | <i>EDF1</i>     | 1.13 | -0.75 | $7.06 \times 10^{-5}$ | 0.0395 | 1 |
| hsa-miR-320a     | 0.55 | <i>PEX11B</i>   | 1.15 | -0.75 | $7.09 \times 10^{-5}$ | 0.0395 | 2 |
| hsa-miR-320a     | 0.55 | <i>RGS16</i>    | 1.52 | -0.75 | $7.25 \times 10^{-5}$ | 0.0395 | 1 |
| hsa-miR-320a     | 0.55 | <i>PBLD</i>     | 1.17 | -0.75 | $7.26 \times 10^{-5}$ | 0.0395 | 2 |
| hsa-miR-320a     | 0.55 | <i>GPR132</i>   | 1.50 | -0.75 | $7.29 \times 10^{-5}$ | 0.0395 | 2 |
| hsa-miR-155-3p   | 2.27 | <i>HBP1</i>     | 0.80 | -0.75 | $7.29 \times 10^{-5}$ | 0.0395 | 2 |
| hsa-miR-9-5p     | 0.57 | <i>HSD11B1</i>  | 1.18 | -0.75 | $7.42 \times 10^{-5}$ | 0.0395 | 1 |
| hsa-miR-320a     | 0.55 | <i>ABR</i>      | 1.23 | -0.75 | $7.47 \times 10^{-5}$ | 0.0395 | 3 |
| hsa-miR-574-3p   | 0.32 | <i>UFD1L</i>    | 1.18 | -0.75 | $7.56 \times 10^{-5}$ | 0.0395 | 2 |
| hsa-miR-155-3p   | 2.27 | <i>AUTS2</i>    | 0.43 | -0.75 | $7.69 \times 10^{-5}$ | 0.0399 | 1 |
| hsa-miR-194-5p   | 0.6  | <i>TSPYL1</i>   | 1.21 | -0.75 | $7.75 \times 10^{-5}$ | 0.0399 | 2 |
| hsa-miR-155-3p   | 2.27 | <i>METTL3</i>   | 0.85 | -0.75 | $7.82 \times 10^{-5}$ | 0.0399 | 1 |
| hsa-miR-155-3p   | 2.27 | <i>RNF168</i>   | 0.73 | -0.75 | $7.93 \times 10^{-5}$ | 0.0399 | 1 |
| hsa-miR-148a-3p  | 2.23 | <i>TRIM5</i>    | 0.76 | -0.75 | $8.05 \times 10^{-5}$ | 0.0399 | 3 |
| hsa-miR-15a-5p   | 1.62 | <i>SUV420H1</i> | 0.87 | -0.74 | $8.58 \times 10^{-5}$ | 0.0408 | 3 |
| hsa-miR-27a-5p   | 1.66 | <i>TRIM5</i>    | 0.76 | -0.74 | $9.00 \times 10^{-5}$ | 0.0409 | 2 |
| hsa-miR-1273h-3p | 0.49 | <i>GHDC</i>     | 1.11 | -0.74 | $9.35 \times 10^{-5}$ | 0.0411 | 4 |
| hsa-miR-454-5p   | 2.14 | <i>KIF6</i>     | 0.75 | -0.74 | $9.36 \times 10^{-5}$ | 0.0411 | 2 |
| hsa-miR-378a-3p  | 0.68 | <i>SLC9A8</i>   | 1.38 | -0.74 | $9.74 \times 10^{-5}$ | 0.0418 | 3 |
| hsa-miR-9-5p     | 0.57 | <i>SEL1L</i>    | 1.22 | -0.74 | $9.83 \times 10^{-5}$ | 0.0419 | 3 |
| hsa-miR-345-5p   | 0.56 | <i>ZNF335</i>   | 1.12 | -0.74 | $9.90 \times 10^{-5}$ | 0.0419 | 1 |
| hsa-miR-194-5p   | 0.6  | <i>RGS16</i>    | 1.52 | -0.74 | $9.94 \times 10^{-5}$ | 0.0419 | 2 |
| hsa-miR-155-3p   | 2.27 | <i>TBRG4</i>    | 0.86 | -0.74 | $1.01 \times 10^{-4}$ | 0.0423 | 1 |
| hsa-miR-155-3p   | 2.27 | <i>CHEK2</i>    | 0.71 | -0.74 | $1.02 \times 10^{-4}$ | 0.0423 | 1 |
| hsa-miR-138-5p   | 0.32 | <i>HSF2BP</i>   | 1.16 | -0.74 | $1.03 \times 10^{-4}$ | 0.0423 | 1 |
| hsa-miR-320a     | 0.55 | <i>CAPNS1</i>   | 1.21 | -0.74 | $1.04 \times 10^{-4}$ | 0.0425 | 3 |

|                  |      |                 |      |       |                       |        |   |
|------------------|------|-----------------|------|-------|-----------------------|--------|---|
| hsa-miR-1273h-3p | 0.49 | <i>YY1AP1</i>   | 1.12 | -0.74 | $1.08 \times 10^{-4}$ | 0.0427 | 2 |
| hsa-miR-320a     | 0.55 | <i>ASCC1</i>    | 1.24 | -0.74 | $1.09 \times 10^{-4}$ | 0.0427 | 4 |
| hsa-miR-378a-3p  | 0.68 | <i>INPP5B</i>   | 1.25 | -0.74 | $1.11 \times 10^{-4}$ | 0.0427 | 2 |
| hsa-miR-320a     | 0.55 | <i>INPP5B</i>   | 1.25 | -0.74 | $1.11 \times 10^{-4}$ | 0.0427 | 2 |
| hsa-miR-142-5p   | 1.58 | <i>MRPS26</i>   | 0.92 | -0.74 | $1.11 \times 10^{-4}$ | 0.0427 | 2 |
| hsa-miR-574-3p   | 0.32 | <i>BCL2L1</i>   | 1.39 | -0.73 | $1.13 \times 10^{-4}$ | 0.0427 | 1 |
| hsa-miR-138-5p   | 0.32 | <i>POM121</i>   | 1.17 | -0.73 | $1.14 \times 10^{-4}$ | 0.0427 | 3 |
| hsa-miR-320a     | 0.55 | <i>PIGL</i>     | 1.59 | -0.73 | $1.14 \times 10^{-4}$ | 0.0427 | 1 |
| hsa-miR-320a     | 0.55 | <i>HSF2BP</i>   | 1.16 | -0.73 | $1.14 \times 10^{-4}$ | 0.0427 | 1 |
| hsa-miR-155-3p   | 2.27 | <i>HLTF</i>     | 0.73 | -0.73 | $1.15 \times 10^{-4}$ | 0.0427 | 2 |
| hsa-miR-320a     | 0.55 | <i>GGA3</i>     | 1.15 | -0.73 | $1.16 \times 10^{-4}$ | 0.0427 | 6 |
| hsa-miR-1273h-3p | 0.49 | <i>PFDN5</i>    | 1.15 | -0.73 | $1.16 \times 10^{-4}$ | 0.0427 | 1 |
| hsa-miR-374a-3p  | 1.74 | <i>SLC35A1</i>  | 0.78 | -0.73 | $1.16 \times 10^{-4}$ | 0.0427 | 1 |
| hsa-miR-1273h-3p | 0.49 | <i>TRAPPC4</i>  | 1.32 | -0.73 | $1.19 \times 10^{-4}$ | 0.0427 | 1 |
| hsa-miR-15a-5p   | 1.62 | <i>TGIF2</i>    | 0.88 | -0.73 | $1.19 \times 10^{-4}$ | 0.0427 | 6 |
| hsa-miR-941      | 0.54 | <i>SLC35A2</i>  | 1.12 | -0.73 | $1.22 \times 10^{-4}$ | 0.0427 | 2 |
| hsa-miR-378a-3p  | 0.68 | <i>PNOC</i>     | 1.40 | -0.73 | $1.23 \times 10^{-4}$ | 0.0427 | 1 |
| hsa-miR-574-3p   | 0.32 | <i>RELL2</i>    | 1.13 | -0.73 | $1.23 \times 10^{-4}$ | 0.0427 | 2 |
| hsa-miR-320a     | 0.55 | <i>GPATCH8</i>  | 1.13 | -0.73 | $1.23 \times 10^{-4}$ | 0.0427 | 5 |
| hsa-miR-9-5p     | 0.57 | <i>EDEM1</i>    | 1.25 | -0.73 | $1.24 \times 10^{-4}$ | 0.0427 | 5 |
| hsa-miR-194-5p   | 0.6  | <i>GRHL3</i>    | 1.18 | -0.73 | $1.25 \times 10^{-4}$ | 0.0427 | 4 |
| hsa-miR-320a     | 0.55 | <i>KRT34</i>    | 1.16 | -0.73 | $1.25 \times 10^{-4}$ | 0.0427 | 1 |
| hsa-miR-155-3p   | 2.27 | <i>TSHZ1</i>    | 0.72 | -0.73 | $1.26 \times 10^{-4}$ | 0.0427 | 5 |
| hsa-miR-505-3p   | 0.5  | <i>H1FO</i>     | 1.40 | -0.73 | $1.26 \times 10^{-4}$ | 0.0427 | 1 |
| hsa-miR-125a-5p  | 0.16 | <i>ACSL4</i>    | 1.22 | -0.73 | $1.28 \times 10^{-4}$ | 0.0427 | 1 |
| hsa-miR-320a     | 0.55 | <i>CYB5D2</i>   | 1.24 | -0.73 | $1.29 \times 10^{-4}$ | 0.0427 | 6 |
| hsa-miR-941      | 0.54 | <i>SETD6</i>    | 1.15 | -0.73 | $1.32 \times 10^{-4}$ | 0.0427 | 2 |
| hsa-miR-574-3p   | 0.32 | <i>LRP10</i>    | 1.29 | -0.73 | $1.33 \times 10^{-4}$ | 0.0427 | 1 |
| hsa-miR-378a-3p  | 0.68 | <i>LILRB4</i>   | 1.74 | -0.73 | $1.33 \times 10^{-4}$ | 0.0427 | 2 |
| hsa-miR-26a-5p   | 1.34 | <i>FKBP10</i>   | 0.80 | -0.73 | $1.33 \times 10^{-4}$ | 0.0427 | 1 |
| hsa-miR-142-3p   | 1.47 | <i>RGMB</i>     | 0.79 | -0.73 | $1.34 \times 10^{-4}$ | 0.0427 | 3 |
| hsa-miR-378a-3p  | 0.68 | <i>SELPLG</i>   | 1.43 | -0.73 | $1.35 \times 10^{-4}$ | 0.0427 | 2 |
| hsa-miR-378a-3p  | 0.68 | <i>PARP15</i>   | 1.30 | -0.73 | $1.35 \times 10^{-4}$ | 0.0427 | 2 |
| hsa-miR-378a-3p  | 0.68 | <i>PIK3CG</i>   | 2.52 | -0.73 | $1.36 \times 10^{-4}$ | 0.0427 | 5 |
| hsa-miR-9-5p     | 0.57 | <i>TMEM131</i>  | 1.40 | -0.73 | $1.36 \times 10^{-4}$ | 0.0427 | 2 |
| hsa-miR-378a-3p  | 0.68 | <i>PAPSS2</i>   | 2.59 | -0.73 | $1.38 \times 10^{-4}$ | 0.0427 | 2 |
| hsa-miR-130b-3p  | 0.69 | <i>RHOA</i>     | 1.11 | -0.73 | $1.38 \times 10^{-4}$ | 0.0427 | 3 |
| hsa-miR-320a     | 0.55 | <i>ASB2</i>     | 4.49 | -0.73 | $1.39 \times 10^{-4}$ | 0.0427 | 3 |
| hsa-miR-155-3p   | 2.27 | <i>EIF4EBP1</i> | 0.80 | -0.73 | $1.39 \times 10^{-4}$ | 0.0427 | 1 |
| hsa-miR-9-5p     | 0.57 | <i>DCAF11</i>   | 1.17 | -0.73 | $1.40 \times 10^{-4}$ | 0.0427 | 2 |
| hsa-miR-320a     | 0.55 | <i>SDF4</i>     | 1.11 | -0.73 | $1.41 \times 10^{-4}$ | 0.0427 | 1 |
| hsa-miR-15a-5p   | 1.62 | <i>SMAD4</i>    | 0.91 | -0.73 | $1.42 \times 10^{-4}$ | 0.0427 | 6 |
| hsa-miR-1273h-3p | 0.49 | <i>QPCTL</i>    | 1.33 | -0.73 | $1.44 \times 10^{-4}$ | 0.0428 | 1 |

|                  |      |                  |      |       |                         |        |   |
|------------------|------|------------------|------|-------|-------------------------|--------|---|
| hsa-miR-155-3p   | 2.27 | <i>PTOV1</i>     | 0.89 | -0.73 | 1.45 x 10 <sup>-4</sup> | 0.0428 | 1 |
| hsa-miR-574-3p   | 0.32 | <i>CASP7</i>     | 1.18 | -0.73 | 1.46 x 10 <sup>-4</sup> | 0.0428 | 2 |
| hsa-miR-378a-3p  | 0.68 | <i>INHBA</i>     | 1.29 | -0.73 | 1.46 x 10 <sup>-4</sup> | 0.0428 | 3 |
| hsa-miR-155-3p   | 2.27 | <i>CHI3L1</i>    | 0.32 | -0.73 | 1.46 x 10 <sup>-4</sup> | 0.0428 | 1 |
| hsa-miR-138-5p   | 0.32 | <i>DERL2</i>     | 1.18 | -0.72 | 1.50 x 10 <sup>-4</sup> | 0.0428 | 1 |
| hsa-miR-574-3p   | 0.32 | <i>GNB1L</i>     | 1.11 | -0.72 | 1.50 x 10 <sup>-4</sup> | 0.0428 | 2 |
| hsa-miR-1273h-3p | 0.49 | <i>SND1</i>      | 1.12 | -0.72 | 1.51 x 10 <sup>-4</sup> | 0.0428 | 4 |
| hsa-miR-9-5p     | 0.57 | <i>PRKRIP1</i>   | 1.11 | -0.72 | 1.51 x 10 <sup>-4</sup> | 0.0428 | 2 |
| hsa-miR-1273h-3p | 0.49 | <i>SUPT5H</i>    | 1.16 | -0.72 | 1.52 x 10 <sup>-4</sup> | 0.0428 | 1 |
| hsa-miR-320a     | 0.55 | <i>SEMA4D</i>    | 1.23 | -0.72 | 1.53 x 10 <sup>-4</sup> | 0.0428 | 3 |
| hsa-miR-1273h-3p | 0.49 | <i>CNN2</i>      | 1.28 | -0.72 | 1.54 x 10 <sup>-4</sup> | 0.0428 | 1 |
| hsa-miR-148a-3p  | 2.23 | <i>HSPA4L</i>    | 0.58 | -0.72 | 1.55 x 10 <sup>-4</sup> | 0.0428 | 4 |
| hsa-miR-155-3p   | 2.27 | <i>KAT2A</i>     | 0.77 | -0.72 | 1.55 x 10 <sup>-4</sup> | 0.0428 | 1 |
| hsa-miR-574-3p   | 0.32 | <i>SLC25A44</i>  | 1.22 | -0.72 | 1.55 x 10 <sup>-4</sup> | 0.0428 | 1 |
| hsa-miR-155-3p   | 2.27 | <i>LBH</i>       | 0.52 | -0.72 | 1.57 x 10 <sup>-4</sup> | 0.0431 | 1 |
| hsa-miR-320a     | 0.55 | <i>PARP15</i>    | 1.30 | -0.72 | 1.59 x 10 <sup>-4</sup> | 0.0432 | 1 |
| hsa-miR-574-3p   | 0.32 | <i>RER1</i>      | 1.11 | -0.72 | 1.61 x 10 <sup>-4</sup> | 0.0434 | 1 |
| hsa-miR-1273h-3p | 0.49 | <i>VEGFB</i>     | 1.41 | -0.72 | 1.61 x 10 <sup>-4</sup> | 0.0434 | 4 |
| hsa-miR-15a-5p   | 1.62 | <i>HMGN5</i>     | 0.78 | -0.72 | 1.62 x 10 <sup>-4</sup> | 0.0434 | 1 |
| hsa-miR-125a-5p  | 0.16 | <i>C9</i>        | 1.13 | -0.72 | 1.63 x 10 <sup>-4</sup> | 0.0434 | 1 |
| hsa-miR-155-3p   | 2.27 | <i>RHOV</i>      | 0.73 | -0.72 | 1.64 x 10 <sup>-4</sup> | 0.0434 | 1 |
| hsa-miR-378a-3p  | 0.68 | <i>GTF2IRD2B</i> | 1.18 | -0.72 | 1.66 x 10 <sup>-4</sup> | 0.0434 | 1 |
| hsa-miR-320a     | 0.55 | <i>INHBA</i>     | 1.29 | -0.72 | 1.68 x 10 <sup>-4</sup> | 0.0435 | 1 |
| hsa-miR-320a     | 0.55 | <i>PLSCR3</i>    | 1.31 | -0.72 | 1.71 x 10 <sup>-4</sup> | 0.0440 | 4 |
| hsa-miR-155-3p   | 2.27 | <i>TIMM50</i>    | 0.85 | -0.72 | 1.73 x 10 <sup>-4</sup> | 0.0440 | 1 |
| hsa-miR-378a-3p  | 0.68 | <i>LSP1</i>      | 1.48 | -0.72 | 1.74 x 10 <sup>-4</sup> | 0.0440 | 1 |
| hsa-miR-320a     | 0.55 | <i>PARD6G</i>    | 2.01 | -0.72 | 1.74 x 10 <sup>-4</sup> | 0.0440 | 4 |
| hsa-miR-574-3p   | 0.32 | <i>ALG1</i>      | 1.19 | -0.72 | 1.75 x 10 <sup>-4</sup> | 0.0440 | 1 |
| hsa-miR-138-5p   | 0.32 | <i>ST8SIA2</i>   | 1.14 | -0.72 | 1.76 x 10 <sup>-4</sup> | 0.0440 | 3 |
| hsa-miR-574-3p   | 0.32 | <i>OSTC</i>      | 1.13 | -0.72 | 1.77 x 10 <sup>-4</sup> | 0.0440 | 1 |
| hsa-miR-378a-3p  | 0.68 | <i>CYP1A1</i>    | 1.41 | -0.72 | 1.77 x 10 <sup>-4</sup> | 0.0440 | 1 |
| hsa-miR-454-5p   | 2.14 | <i>DAAM2</i>     | 0.62 | -0.72 | 1.78 x 10 <sup>-4</sup> | 0.0440 | 2 |
| hsa-miR-148a-3p  | 2.23 | <i>PNPT1</i>     | 0.78 | -0.72 | 1.78 x 10 <sup>-4</sup> | 0.0440 | 2 |
| hsa-miR-378a-3p  | 0.68 | <i>TNFAIP1</i>   | 1.10 | -0.72 | 1.79 x 10 <sup>-4</sup> | 0.0442 | 2 |
| hsa-miR-155-3p   | 2.27 | <i>ZFP62</i>     | 0.84 | -0.72 | 1.84 x 10 <sup>-4</sup> | 0.0446 | 5 |
| hsa-miR-941      | 0.54 | <i>PDE1B</i>     | 1.28 | -0.72 | 1.85 x 10 <sup>-4</sup> | 0.0446 | 2 |
| hsa-miR-26b-5p   | 1.78 | <i>GNPDA1</i>    | 0.75 | -0.72 | 1.85 x 10 <sup>-4</sup> | 0.0446 | 2 |
| hsa-miR-1273h-3p | 0.49 | <i>BCKDK</i>     | 1.21 | -0.72 | 1.86 x 10 <sup>-4</sup> | 0.0446 | 2 |
| hsa-miR-378a-3p  | 0.68 | <i>GABARAP</i>   | 1.14 | -0.72 | 1.87 x 10 <sup>-4</sup> | 0.0446 | 1 |
| hsa-miR-9-5p     | 0.57 | <i>MAPKAPK2</i>  | 1.22 | -0.72 | 1.88 x 10 <sup>-4</sup> | 0.0446 | 6 |
| hsa-miR-138-5p   | 0.32 | <i>CNN2</i>      | 1.28 | -0.72 | 1.88 x 10 <sup>-4</sup> | 0.0446 | 1 |
| hsa-miR-345-5p   | 0.56 | <i>NENF</i>      | 1.22 | -0.72 | 1.89 x 10 <sup>-4</sup> | 0.0446 | 2 |
| hsa-miR-155-3p   | 2.27 | <i>SLC41A1</i>   | 0.56 | -0.72 | 1.90 x 10 <sup>-4</sup> | 0.0446 | 1 |

|                  |      |                |      |       |                         |        |   |
|------------------|------|----------------|------|-------|-------------------------|--------|---|
| hsa-miR-155-3p   | 2.27 | <i>OGDHL</i>   | 0.68 | -0.72 | 1.92 x 10 <sup>-4</sup> | 0.0446 | 1 |
| hsa-miR-142-3p   | 1.47 | <i>MKKS</i>    | 0.77 | -0.72 | 1.92 x 10 <sup>-4</sup> | 0.0446 | 1 |
| hsa-miR-378a-3p  | 0.68 | <i>PAR6G</i>   | 2.01 | -0.72 | 1.93 x 10 <sup>-4</sup> | 0.0446 | 2 |
| hsa-miR-125a-5p  | 0.16 | <i>TCF19</i>   | 1.20 | -0.72 | 1.95 x 10 <sup>-4</sup> | 0.0447 | 1 |
| hsa-miR-1273h-3p | 0.49 | <i>CYB5D2</i>  | 1.24 | -0.72 | 1.95 x 10 <sup>-4</sup> | 0.0447 | 3 |
| hsa-miR-345-5p   | 0.56 | <i>TOLLIP</i>  | 1.16 | -0.72 | 1.95 x 10 <sup>-4</sup> | 0.0447 | 4 |
| hsa-miR-374a-3p  | 1.74 | <i>GPBP1</i>   | 0.81 | -0.72 | 1.97 x 10 <sup>-4</sup> | 0.0447 | 2 |
| hsa-miR-155-3p   | 2.27 | <i>SIRT5</i>   | 0.81 | -0.71 | 1.99 x 10 <sup>-4</sup> | 0.0448 | 1 |
| hsa-miR-374a-3p  | 1.74 | <i>ZFAT</i>    | 0.79 | -0.71 | 2.00 x 10 <sup>-4</sup> | 0.0448 | 3 |
| hsa-miR-26b-5p   | 1.78 | <i>LDLR</i>    | 0.85 | -0.71 | 2.00 x 10 <sup>-4</sup> | 0.0448 | 2 |
| hsa-miR-320a     | 0.55 | <i>MSRA</i>    | 1.48 | -0.71 | 2.03 x 10 <sup>-4</sup> | 0.0451 | 1 |
| hsa-miR-378a-3p  | 0.68 | <i>TMEM109</i> | 1.32 | -0.71 | 2.07 x 10 <sup>-4</sup> | 0.0452 | 2 |
| hsa-miR-378a-3p  | 0.68 | <i>EDEM1</i>   | 1.25 | -0.71 | 2.08 x 10 <sup>-4</sup> | 0.0452 | 5 |
| hsa-miR-1273h-3p | 0.49 | <i>PIGT</i>    | 1.13 | -0.71 | 2.08 x 10 <sup>-4</sup> | 0.0452 | 1 |
| hsa-miR-1273h-3p | 0.49 | <i>WASF2</i>   | 1.14 | -0.71 | 2.09 x 10 <sup>-4</sup> | 0.0452 | 3 |
| hsa-miR-142-3p   | 1.47 | <i>TBRG4</i>   | 0.86 | -0.71 | 2.10 x 10 <sup>-4</sup> | 0.0452 | 1 |
| hsa-miR-15a-5p   | 1.62 | <i>MTX3</i>    | 0.72 | -0.71 | 2.10 x 10 <sup>-4</sup> | 0.0452 | 1 |
| hsa-miR-374a-3p  | 1.74 | <i>TARBP2</i>  | 0.87 | -0.71 | 2.10 x 10 <sup>-4</sup> | 0.0452 | 1 |
| hsa-miR-27a-5p   | 1.66 | <i>KMO</i>     | 1.36 | -0.71 | 2.11 x 10 <sup>-4</sup> | 0.0453 | 2 |
| hsa-let-7d-3p    | 0.71 | <i>CYB5R1</i>  | 1.11 | -0.71 | 2.13 x 10 <sup>-4</sup> | 0.0454 | 1 |
| hsa-miR-320a     | 0.55 | <i>RBM3</i>    | 2.00 | -0.71 | 2.16 x 10 <sup>-4</sup> | 0.0459 | 2 |
| hsa-miR-378a-3p  | 0.68 | <i>FA2H</i>    | 1.18 | -0.71 | 2.17 x 10 <sup>-4</sup> | 0.0460 | 1 |
| hsa-miR-155-3p   | 2.27 | <i>AEBP2</i>   | 0.90 | -0.71 | 2.19 x 10 <sup>-4</sup> | 0.0462 | 3 |
| hsa-miR-138-5p   | 0.32 | <i>GPS2</i>    | 1.13 | -0.71 | 2.20 x 10 <sup>-4</sup> | 0.0462 | 2 |
| hsa-miR-378a-3p  | 0.68 | <i>GGA3</i>    | 1.15 | -0.71 | 2.20 x 10 <sup>-4</sup> | 0.0462 | 1 |
| hsa-miR-1273h-3p | 0.49 | <i>UROD</i>    | 1.27 | -0.71 | 2.24 x 10 <sup>-4</sup> | 0.0464 | 1 |
| hsa-miR-941      | 0.54 | <i>MCF2L2</i>  | 1.13 | -0.71 | 2.27 x 10 <sup>-4</sup> | 0.0466 | 2 |
| hsa-miR-378a-3p  | 0.68 | <i>CTNBP1</i>  | 1.14 | -0.71 | 2.28 x 10 <sup>-4</sup> | 0.0466 | 3 |
| hsa-miR-155-3p   | 2.27 | <i>TYSND1</i>  | 0.86 | -0.71 | 2.28 x 10 <sup>-4</sup> | 0.0466 | 3 |
| hsa-miR-941      | 0.54 | <i>RIC8A</i>   | 1.15 | -0.71 | 2.29 x 10 <sup>-4</sup> | 0.0466 | 2 |
| hsa-miR-378a-3p  | 0.68 | <i>PSD3</i>    | 1.18 | -0.71 | 2.31 x 10 <sup>-4</sup> | 0.0468 | 5 |
| hsa-miR-378a-3p  | 0.68 | <i>PLCB3</i>   | 1.23 | -0.71 | 2.34 x 10 <sup>-4</sup> | 0.0468 | 2 |
| hsa-miR-155-3p   | 2.27 | <i>RPL31</i>   | 0.90 | -0.71 | 2.34 x 10 <sup>-4</sup> | 0.0468 | 1 |
| hsa-miR-345-5p   | 0.56 | <i>ST8SIA2</i> | 1.14 | -0.71 | 2.34 x 10 <sup>-4</sup> | 0.0468 | 4 |
| hsa-miR-130b-3p  | 0.69 | <i>CARM1</i>   | 1.09 | -0.71 | 2.36 x 10 <sup>-4</sup> | 0.0470 | 2 |
| hsa-miR-22-3p    | 1.79 | <i>HJURP</i>   | 0.85 | -0.71 | 2.37 x 10 <sup>-4</sup> | 0.0471 | 1 |
| hsa-miR-320a     | 0.55 | <i>MATN2</i>   | 1.19 | -0.71 | 2.37 x 10 <sup>-4</sup> | 0.0471 | 2 |
| hsa-miR-425-5p   | 0.73 | <i>INHBA</i>   | 1.29 | -0.71 | 2.40 x 10 <sup>-4</sup> | 0.0473 | 1 |
| hsa-miR-9-5p     | 0.57 | <i>GPR114</i>  | 1.90 | -0.71 | 2.42 x 10 <sup>-4</sup> | 0.0474 | 4 |
| hsa-miR-574-3p   | 0.32 | <i>UTP3</i>    | 1.22 | -0.71 | 2.43 x 10 <sup>-4</sup> | 0.0474 | 1 |
| hsa-miR-320a     | 0.55 | <i>ARRDC3</i>  | 1.52 | -0.71 | 2.43 x 10 <sup>-4</sup> | 0.0474 | 4 |
| hsa-miR-155-3p   | 2.27 | <i>TRAK1</i>   | 0.76 | -0.71 | 2.44 x 10 <sup>-4</sup> | 0.0474 | 5 |
| hsa-miR-378a-3p  | 0.68 | <i>SLC2A5</i>  | 2.62 | -0.71 | 2.45 x 10 <sup>-4</sup> | 0.0475 | 1 |

|                  |      |                 |      |       |                       |        |   |
|------------------|------|-----------------|------|-------|-----------------------|--------|---|
| hsa-miR-1273h-3p | 0.49 | <i>RER1</i>     | 1.11 | -0.71 | $2.46 \times 10^{-4}$ | 0.0475 | 1 |
| hsa-miR-574-3p   | 0.32 | <i>CLN6</i>     | 1.21 | -0.71 | $2.49 \times 10^{-4}$ | 0.0477 | 2 |
| hsa-miR-574-3p   | 0.32 | <i>CDV3</i>     | 1.12 | -0.71 | $2.50 \times 10^{-4}$ | 0.0477 | 2 |
| hsa-miR-181d-5p  | 0.55 | <i>STAT5A</i>   | 1.25 | -0.71 | $2.51 \times 10^{-4}$ | 0.0477 | 3 |
| hsa-miR-320a     | 0.55 | <i>CCL22</i>    | 2.56 | -0.71 | $2.52 \times 10^{-4}$ | 0.0477 | 3 |
| hsa-miR-345-5p   | 0.56 | <i>FSTL3</i>    | 1.64 | -0.71 | $2.53 \times 10^{-4}$ | 0.0477 | 1 |
| hsa-miR-378a-3p  | 0.68 | <i>SEMA4D</i>   | 1.23 | -0.71 | $2.57 \times 10^{-4}$ | 0.0480 | 3 |
| hsa-miR-320a     | 0.55 | <i>UROD</i>     | 1.27 | -0.71 | $2.58 \times 10^{-4}$ | 0.0481 | 2 |
| hsa-miR-320a     | 0.55 | <i>CES2</i>     | 1.17 | -0.70 | $2.59 \times 10^{-4}$ | 0.0481 | 2 |
| hsa-miR-345-5p   | 0.56 | <i>PODXL</i>    | 1.14 | -0.70 | $2.63 \times 10^{-4}$ | 0.0483 | 4 |
| hsa-miR-574-3p   | 0.32 | <i>RBBP9</i>    | 1.30 | -0.70 | $2.63 \times 10^{-4}$ | 0.0483 | 2 |
| hsa-miR-138-5p   | 0.32 | <i>POM121C</i>  | 1.15 | -0.70 | $2.64 \times 10^{-4}$ | 0.0483 | 2 |
| hsa-miR-27a-5p   | 1.66 | <i>SELL</i>     | 0.44 | -0.70 | $2.64 \times 10^{-4}$ | 0.0483 | 2 |
| hsa-miR-9-5p     | 0.57 | <i>INHBA</i>    | 1.29 | -0.70 | $2.65 \times 10^{-4}$ | 0.0483 | 2 |
| hsa-miR-15a-5p   | 1.62 | <i>NARS2</i>    | 0.82 | -0.70 | $2.65 \times 10^{-4}$ | 0.0483 | 1 |
| hsa-miR-320a     | 0.55 | <i>SF3A1</i>    | 1.17 | -0.70 | $2.66 \times 10^{-4}$ | 0.0483 | 6 |
| hsa-miR-574-3p   | 0.32 | <i>SEC61A1</i>  | 1.20 | -0.70 | $2.67 \times 10^{-4}$ | 0.0483 | 1 |
| hsa-miR-378a-3p  | 0.68 | <i>ABCA10</i>   | 1.39 | -0.70 | $2.70 \times 10^{-4}$ | 0.0483 | 1 |
| hsa-miR-320a     | 0.55 | <i>VEGFB</i>    | 1.41 | -0.70 | $2.70 \times 10^{-4}$ | 0.0483 | 2 |
| hsa-miR-320a     | 0.55 | <i>LPXN</i>     | 1.47 | -0.70 | $2.71 \times 10^{-4}$ | 0.0483 | 1 |
| hsa-miR-378a-3p  | 0.68 | <i>NEK8</i>     | 1.19 | -0.70 | $2.73 \times 10^{-4}$ | 0.0484 | 1 |
| hsa-miR-320a     | 0.55 | <i>PIGT</i>     | 1.13 | -0.70 | $2.73 \times 10^{-4}$ | 0.0484 | 2 |
| hsa-miR-9-5p     | 0.57 | <i>DNAH1</i>    | 1.18 | -0.70 | $2.73 \times 10^{-4}$ | 0.0484 | 2 |
| hsa-miR-138-5p   | 0.32 | <i>CCNK</i>     | 1.17 | -0.70 | $2.75 \times 10^{-4}$ | 0.0484 | 2 |
| hsa-miR-15a-5p   | 1.62 | <i>RBBP5</i>    | 0.87 | -0.70 | $2.76 \times 10^{-4}$ | 0.0484 | 3 |
| hsa-miR-155-3p   | 2.27 | <i>IKZF2</i>    | 0.68 | -0.70 | $2.77 \times 10^{-4}$ | 0.0485 | 2 |
| hsa-miR-320a     | 0.55 | <i>BRD9</i>     | 1.14 | -0.70 | $2.79 \times 10^{-4}$ | 0.0485 | 2 |
| hsa-miR-574-3p   | 0.32 | <i>MBD2</i>     | 1.11 | -0.70 | $2.81 \times 10^{-4}$ | 0.0485 | 1 |
| hsa-miR-378a-3p  | 0.68 | <i>YIPF3</i>    | 1.35 | -0.70 | $2.82 \times 10^{-4}$ | 0.0485 | 1 |
| hsa-miR-320a     | 0.55 | <i>ABCA5</i>    | 1.37 | -0.70 | $2.82 \times 10^{-4}$ | 0.0485 | 3 |
| hsa-miR-138-5p   | 0.32 | <i>WBP2</i>     | 1.20 | -0.70 | $2.84 \times 10^{-4}$ | 0.0487 | 4 |
| hsa-miR-374a-3p  | 1.74 | <i>RBM39</i>    | 0.90 | -0.70 | $2.87 \times 10^{-4}$ | 0.0487 | 2 |
| hsa-miR-320a     | 0.55 | <i>STS</i>      | 1.86 | -0.70 | $2.90 \times 10^{-4}$ | 0.0487 | 6 |
| hsa-miR-378a-3p  | 0.68 | <i>GTF2IRD2</i> | 1.17 | -0.70 | $2.91 \times 10^{-4}$ | 0.0487 | 1 |
| hsa-miR-125a-5p  | 0.16 | <i>MAP4</i>     | 1.08 | -0.70 | $2.92 \times 10^{-4}$ | 0.0487 | 4 |
| hsa-miR-378a-3p  | 0.68 | <i>MARK2</i>    | 1.14 | -0.70 | $2.92 \times 10^{-4}$ | 0.0487 | 1 |
| hsa-miR-374a-3p  | 1.74 | <i>ZC3HC1</i>   | 0.88 | -0.70 | $2.92 \times 10^{-4}$ | 0.0487 | 1 |
| hsa-miR-505-3p   | 0.5  | <i>KIAA0195</i> | 1.10 | -0.70 | $2.92 \times 10^{-4}$ | 0.0487 | 1 |
| hsa-miR-345-5p   | 0.56 | <i>RAP2C</i>    | 1.09 | -0.70 | $2.93 \times 10^{-4}$ | 0.0487 | 2 |
| hsa-miR-148a-3p  | 2.23 | <i>ZNF184</i>   | 0.77 | -0.70 | $2.93 \times 10^{-4}$ | 0.0487 | 1 |
| hsa-miR-138-5p   | 0.32 | <i>GGA3</i>     | 1.15 | -0.70 | $2.93 \times 10^{-4}$ | 0.0487 | 7 |
| hsa-miR-15a-5p   | 1.62 | <i>TRAK1</i>    | 0.76 | -0.70 | $2.94 \times 10^{-4}$ | 0.0487 | 4 |
| hsa-miR-15a-5p   | 1.62 | <i>PTPN2</i>    | 0.84 | -0.70 | $2.98 \times 10^{-4}$ | 0.0487 | 1 |

|                  |      |                 |      |       |                       |        |   |
|------------------|------|-----------------|------|-------|-----------------------|--------|---|
| hsa-miR-320a     | 0.55 | <i>BLCAP</i>    | 1.18 | -0.70 | $2.98 \times 10^{-4}$ | 0.0487 | 5 |
| hsa-miR-1273h-3p | 0.49 | <i>SF3A2</i>    | 1.14 | -0.70 | $2.98 \times 10^{-4}$ | 0.0487 | 1 |
| hsa-miR-9-5p     | 0.57 | <i>POLR3C</i>   | 1.17 | -0.70 | $3.01 \times 10^{-4}$ | 0.0487 | 1 |
| hsa-miR-9-5p     | 0.57 | <i>ZZEF1</i>    | 1.10 | -0.70 | $3.01 \times 10^{-4}$ | 0.0487 | 2 |
| hsa-miR-744-5p   | 1.59 | <i>CD59</i>     | 0.84 | -0.70 | $3.01 \times 10^{-4}$ | 0.0487 | 2 |
| hsa-miR-345-5p   | 0.56 | <i>SLC12A4</i>  | 1.29 | -0.70 | $3.01 \times 10^{-4}$ | 0.0487 | 1 |
| hsa-miR-320a     | 0.55 | <i>FAM129A</i>  | 1.70 | -0.70 | $3.02 \times 10^{-4}$ | 0.0487 | 7 |
| hsa-miR-574-3p   | 0.32 | <i>POM121</i>   | 1.17 | -0.70 | $3.05 \times 10^{-4}$ | 0.0487 | 2 |
| hsa-miR-320a     | 0.55 | <i>H6PD</i>     | 1.28 | -0.70 | $3.06 \times 10^{-4}$ | 0.0487 | 3 |
| hsa-miR-320a     | 0.55 | <i>BCL2L15</i>  | 1.19 | -0.70 | $3.06 \times 10^{-4}$ | 0.0487 | 3 |
| hsa-miR-574-3p   | 0.32 | <i>LANCL2</i>   | 1.20 | -0.70 | $3.06 \times 10^{-4}$ | 0.0487 | 1 |
| hsa-miR-1273h-3p | 0.49 | <i>GPBP1L1</i>  | 1.08 | -0.70 | $3.06 \times 10^{-4}$ | 0.0487 | 4 |
| hsa-miR-15a-5p   | 1.62 | <i>CENPA</i>    | 0.82 | -0.70 | $3.07 \times 10^{-4}$ | 0.0487 | 2 |
| hsa-miR-194-5p   | 0.6  | <i>CREM</i>     | 1.34 | -0.70 | $3.10 \times 10^{-4}$ | 0.0487 | 1 |
| hsa-miR-142-3p   | 1.47 | <i>SLC9A3R1</i> | 0.83 | -0.70 | $3.10 \times 10^{-4}$ | 0.0487 | 2 |
| hsa-miR-130b-3p  | 0.69 | <i>B4GALT5</i>  | 1.21 | -0.70 | $3.10 \times 10^{-4}$ | 0.0487 | 7 |
| hsa-miR-320a     | 0.55 | <i>WBP2</i>     | 1.20 | -0.70 | $3.10 \times 10^{-4}$ | 0.0487 | 2 |
| hsa-miR-148a-3p  | 2.23 | <i>TBCK</i>     | 0.83 | -0.70 | $3.12 \times 10^{-4}$ | 0.0487 | 1 |
| hsa-miR-941      | 0.54 | <i>HEXA</i>     | 1.22 | -0.70 | $3.12 \times 10^{-4}$ | 0.0487 | 1 |
| hsa-miR-148b-3p  | 2.32 | <i>SNX16</i>    | 0.65 | -0.70 | $3.13 \times 10^{-4}$ | 0.0487 | 2 |
| hsa-miR-26b-5p   | 1.78 | <i>EVI5</i>     | 0.65 | -0.70 | $3.14 \times 10^{-4}$ | 0.0487 | 2 |
| hsa-miR-15a-5p   | 1.62 | <i>ZMYND11</i>  | 0.87 | -0.70 | $3.14 \times 10^{-4}$ | 0.0487 | 3 |
| hsa-miR-378a-3p  | 0.68 | <i>SF3A1</i>    | 1.17 | -0.70 | $3.15 \times 10^{-4}$ | 0.0487 | 3 |
| hsa-miR-142-3p   | 1.47 | <i>MRPS11</i>   | 0.83 | -0.70 | $3.17 \times 10^{-4}$ | 0.0487 | 2 |
| hsa-miR-125a-5p  | 0.16 | <i>FLG</i>      | 1.14 | -0.70 | $3.17 \times 10^{-4}$ | 0.0487 | 4 |
| hsa-miR-505-3p   | 0.5  | <i>TSC2</i>     | 1.21 | -0.70 | $3.18 \times 10^{-4}$ | 0.0487 | 1 |
| hsa-miR-1273h-3p | 0.49 | <i>TOLLIP</i>   | 1.16 | -0.70 | $3.18 \times 10^{-4}$ | 0.0487 | 2 |
| hsa-miR-505-3p   | 0.5  | <i>BOD1</i>     | 1.11 | -0.70 | $3.20 \times 10^{-4}$ | 0.0487 | 2 |
| hsa-miR-155-3p   | 2.27 | <i>DTX4</i>     | 0.56 | -0.70 | $3.20 \times 10^{-4}$ | 0.0487 | 4 |
| hsa-miR-320a     | 0.55 | <i>MED15</i>    | 1.30 | -0.70 | $3.20 \times 10^{-4}$ | 0.0487 | 2 |
| hsa-miR-374a-3p  | 1.74 | <i>IL17RB</i>   | 0.29 | -0.70 | $3.21 \times 10^{-4}$ | 0.0487 | 1 |
| hsa-miR-320a     | 0.55 | <i>SMAP2</i>    | 1.14 | -0.70 | $3.23 \times 10^{-4}$ | 0.0489 | 4 |
| hsa-miR-378a-3p  | 0.68 | <i>MKMK1</i>    | 1.19 | -0.70 | $3.26 \times 10^{-4}$ | 0.0489 | 2 |
| hsa-miR-320a     | 0.55 | <i>SND1</i>     | 1.12 | -0.70 | $3.27 \times 10^{-4}$ | 0.0489 | 6 |
| hsa-miR-374a-3p  | 1.74 | <i>DTX4</i>     | 0.56 | -0.70 | $3.27 \times 10^{-4}$ | 0.0489 | 1 |
| hsa-miR-378a-3p  | 0.68 | <i>ADRM1</i>    | 1.25 | -0.70 | $3.28 \times 10^{-4}$ | 0.0489 | 1 |
| hsa-miR-574-3p   | 0.32 | <i>PRDM1</i>    | 1.45 | -0.70 | $3.28 \times 10^{-4}$ | 0.0489 | 1 |
| hsa-miR-26b-5p   | 1.78 | <i>MED14</i>    | 0.91 | -0.70 | $3.29 \times 10^{-4}$ | 0.0489 | 1 |
| hsa-miR-155-3p   | 2.27 | <i>RNF114</i>   | 0.81 | -0.70 | $3.31 \times 10^{-4}$ | 0.0491 | 6 |
| hsa-miR-374a-3p  | 1.74 | <i>SSTR2</i>    | 0.60 | -0.70 | $3.33 \times 10^{-4}$ | 0.0492 | 2 |
| hsa-miR-15a-5p   | 1.62 | <i>ZBTB11</i>   | 0.86 | -0.70 | $3.34 \times 10^{-4}$ | 0.0492 | 3 |
| hsa-miR-574-3p   | 0.32 | <i>P2RY1</i>    | 1.20 | -0.69 | $3.40 \times 10^{-4}$ | 0.0496 | 2 |
| hsa-miR-155-3p   | 2.27 | <i>PIAS1</i>    | 0.90 | -0.69 | $3.40 \times 10^{-4}$ | 0.0496 | 3 |



|                  |      |              |      |       |                       |        |   |
|------------------|------|--------------|------|-------|-----------------------|--------|---|
| hsa-miR-155-3p   | 2.27 | <i>MIF</i>   | 0.85 | -0.69 | $3.43 \times 10^{-4}$ | 0.0497 | 1 |
| hsa-miR-1273h-3p | 0.49 | <i>ZZEF1</i> | 1.10 | -0.69 | $3.43 \times 10^{-4}$ | 0.0497 | 4 |
| hsa-miR-9-5p     | 0.57 | <i>NSD1</i>  | 1.12 | -0.69 | $3.46 \times 10^{-4}$ | 0.0499 | 3 |

Correlations between miRNAs and mRNAs differentially expressed between lithium excellent responders and non-responders were analyzed using miRComb. Multiple testing correction was performed according to BH. The *in-silico* score was calculated by summing the number of algorithms predicting each miRNA-mRNA pair (seven prediction algorithms were tested: MiRWalk, MicroT v4, MiRanda, miRDB, RNA22, RNAhybrid and TargetScan). Abbreviations: FC, fold change; FDR, false discovery rate.

**Table S3.** Pairs of miRNAs and mRNAs differentially expressed after *in vitro* lithium treatment exclusively in excellent responders, negatively correlated and predicted by in-silico algorithms.

| miRNA           | FC   | mRNA           | FC   | Pearson's r | p      | FDR q | <i>In-silico</i> score |
|-----------------|------|----------------|------|-------------|--------|-------|------------------------|
| hsa-miR-374a-5p | 1.41 | <i>B4GALT6</i> | 0.82 | -0.59       | 0.0041 | 0.35  | 5                      |
| hsa-miR-29b-3p  | 1.18 | <i>ZNF577</i>  | 0.88 | -0.49       | 0.0162 | 0.65  | 5                      |
| hsa-miR-29b-3p  | 1.54 | <i>RFX7</i>    | 0.92 | -0.49       | 0.0164 | 0.65  | 6                      |
| hsa-miR-106b-5p | 1.41 | <i>ZNF493</i>  | 0.84 | -0.47       | 0.0216 | 0.67  | 2                      |
| hsa-miR-23a-3p  | 1.28 | <i>FFAR2</i>   | 0.84 | -0.42       | 0.0363 | 0.86  | 1                      |
| hsa-miR-27a-3p  | 1.25 | <i>ZNF493</i>  | 0.84 | -0.41       | 0.0413 | 0.86  | 6                      |
| hsa-miR-27a-3p  | 1.18 | <i>IKBIP</i>   | 0.87 | -0.40       | 0.0459 | 0.86  | 1                      |

Correlations between miRNAs and mRNAs differentially expressed after *in vitro* lithium treatment exclusively in excellent responders were analyzed using miRComb. No correlation was significant after multiple testing correction according to BH. The *in-silico* score was calculated by summing the number of algorithms predicting each miRNA-mRNA pair (seven prediction algorithms were tested: MiRWalk, MicroT v4, MiRanda, miRDB, RNA22, RNAhybrid and TargetScan). Abbreviations: FC, fold change; FDR, false discovery rate.

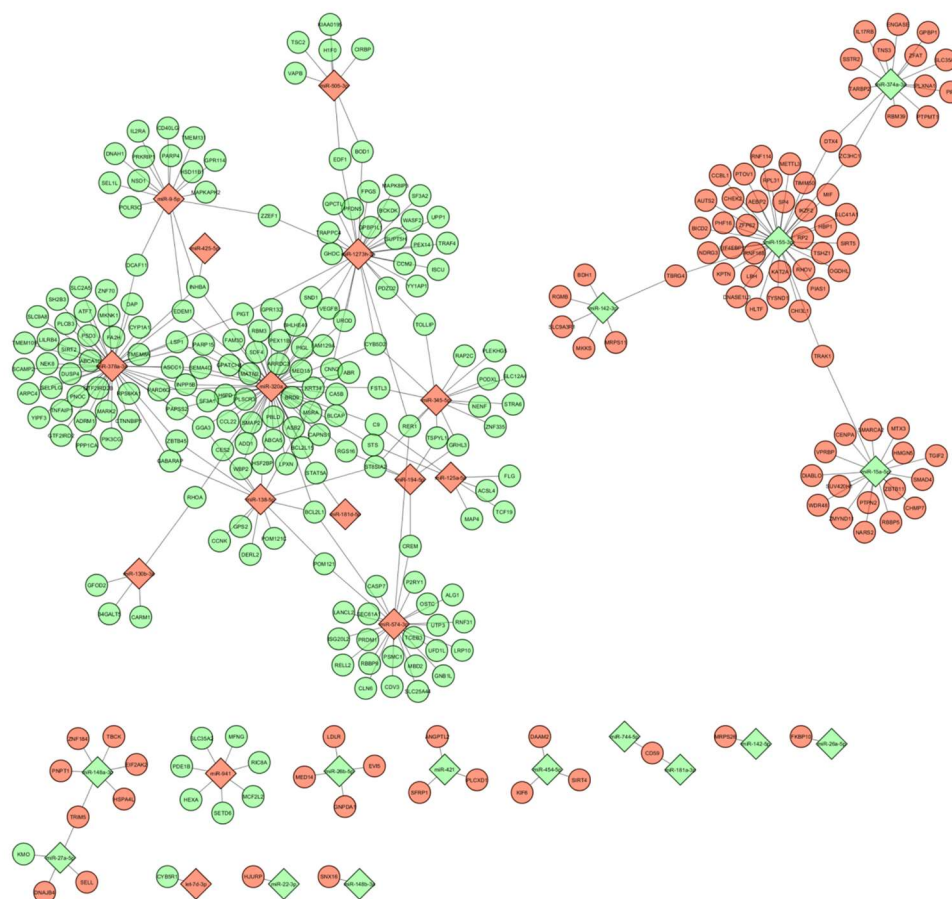

**Figure S1.** Interaction network between miRNAs and mRNAs differentially expressed between lithium excellent responders and non-responders. The interaction network of miRNAs and mRNAs differentially expressed between lithium excellent responders and non-responders was obtained using a force-directed layout algorithm in Cytoscape. miRNAs are indicated with a diamond, target mRNAs with circles. Down-regulated miRNAs or mRNAs are shown in red, while up-regulated miRNAs or mRNAs are shown in green. The network shows two main cluster of down-regulated and up-regulated miRNAs centered around miR-320a and miR-155-3p, respectively.

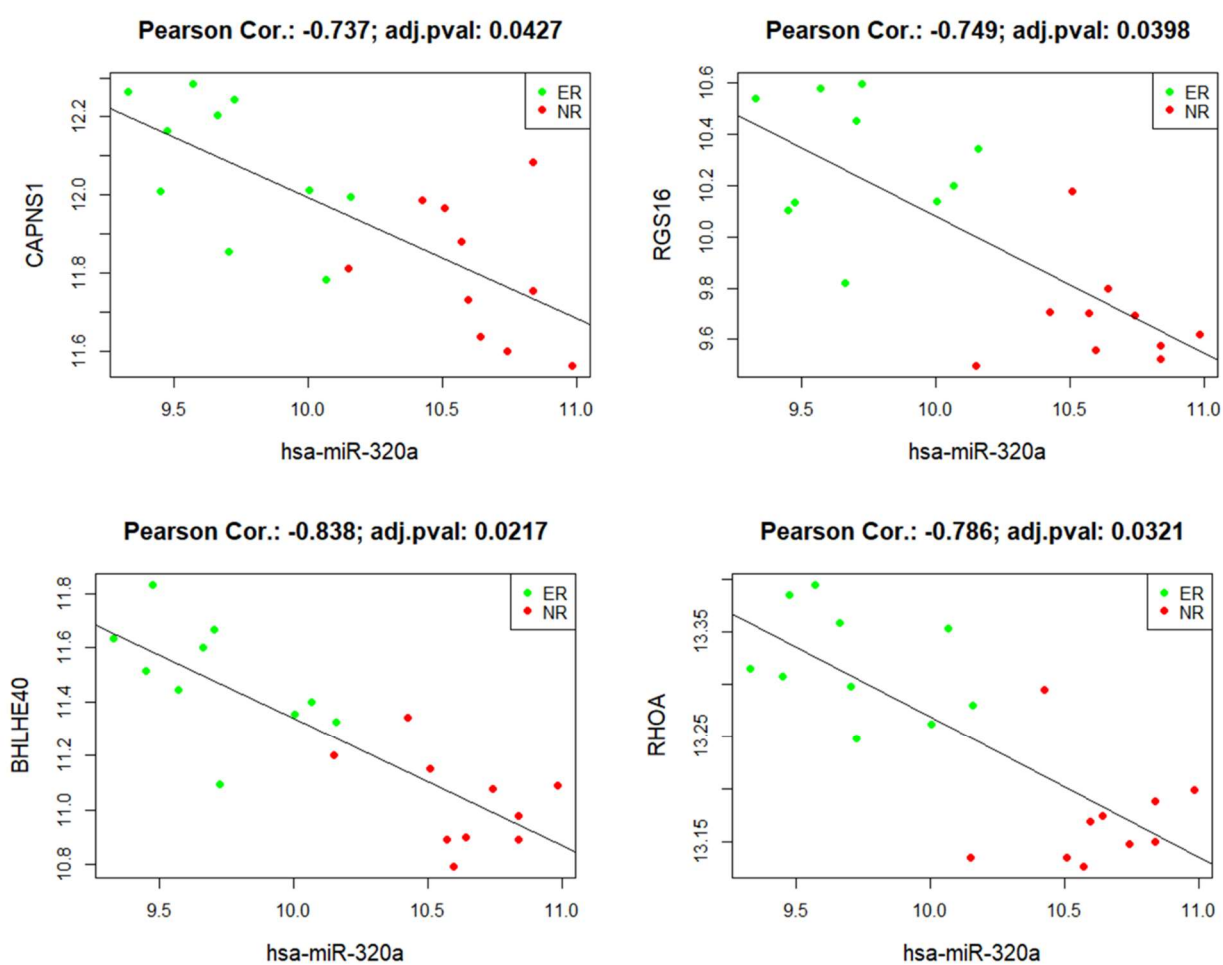

**Figure S2.** Correlations between the expression levels of hsa-miR-320a and its targets *CAPNS1*, *RGS16*, *BHLHE40* and *RHOA* in lithium excellent responders and non-responders. Abbreviations: adj, adjusted; cor, correlation; ER, excellent responders; NR, non-responders.

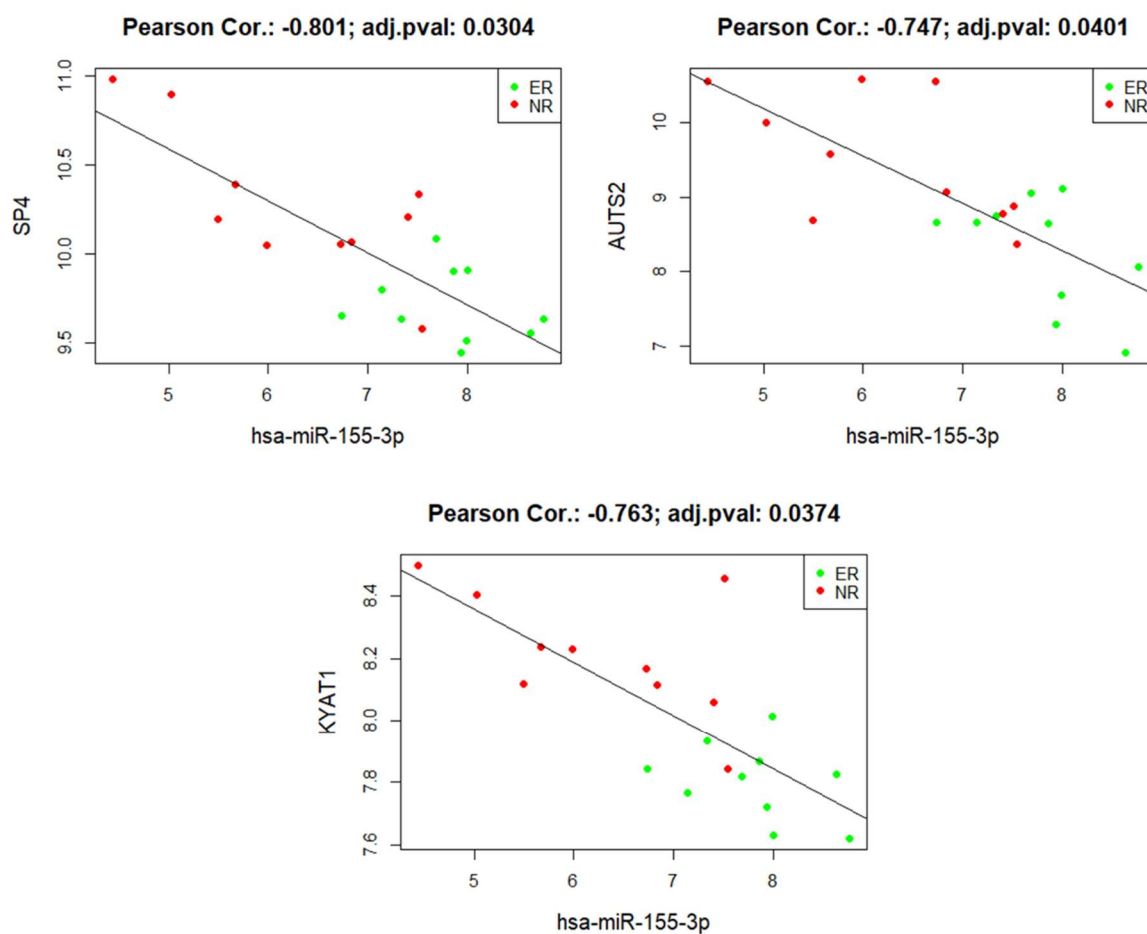

**Figure S3.** Correlations between the expression levels of hsa-miR-155-3p and its targets *SP4*, *AUTS2* and *KYAT1* in lithium excellent responders and non-responders. Abbreviations: adj, adjusted; cor, correlation; ER, excellent responders; NR, non-responders.
